# Supplementary material for: Global, regional, and national burden of cardiovascular diseases attributable to high body mass index from 1990 to 2021
Source: Front Cardiovasc Med. 2025 Sep 12;12:1641689. doi: 10.3389/fcvm.2025.1641689 (PMC12465627; doi:10.3389/fcvm.2025.1641689)
Supplement: Supplementary file 1 [file Table1.xlsx]

## Sheet: Sheet1
Supplementary Table S1 The number of deaths and ASMR in 1990/2021 and temporal trends of ASMR for 204 countries and territories.
Countries/Territories	Number of death cases, 1990 (95%UI)	ASMR per 100,000 population, 1990 (95%UI)	Number of death cases, 2021 (95%UI)	ASMR per 100,000 population, 2021 (95%UI)	EAPC in ASMR per 100,000 population, 1990-2021 (95%CI)
American Samoa	12.79 (5.55, 19.71)	53.91 (24.88, 83.73)	29.55 (13.63, 46.59)	62.14 (28.74, 98.01)	0.44 (0.34, 0.54)
Antigua and Barbuda	17.36 (11.26, 25.29)	31.89 (20.82, 46.54)	37.42 (26.17, 50.65)	38.71 (25.37, 53.21)	0.68 (0.34, 1.02)
Arab Republic of Egypt	25431.16 (15001.45, 37174.95)	119.17 (71.40, 174.46)	69444.37 (36811.32, 104589.06)	136.89 (75.82, 203.74)	0.85 (0.70, 0.99)
Argentine Republic	10299.72 (5358.07, 16395.45)	33.64 (17.66, 53.41)	12567.04 (7183.34, 18785.30)	21.91 (12.52, 32.76)	-1.02 (-1.15, -0.89)
Australia	4595.23 (1878.73, 7853.40)	24.20 (9.97, 41.62)	5582.05 (2643.03, 9273.90)	11.05 (5.14, 18.26)	-2.70 (-2.82, -2.58)
Barbados	77.20 (42.19, 123.16)	26.76 (14.72, 42.45)	134.26 (73.72, 208.99)	26.05 (14.34, 40.57)	0.00 (-0.14, 0.14)
Belize	27.03 (15.41, 40.97)	29.02 (16.60, 43.90)	92.08 (59.35, 129.18)	32.49 (20.71, 45.47)	0.20 (-0.12, 0.52)
Bermuda	23.60 (10.66, 39.19)	39.85 (18.21, 66.52)	31.02 (16.03, 50.00)	21.19 (11.09, 34.08)	-2.01 (-2.38, -1.65)
Bolivarian Republic of Venezuela	3755.49 (2290.00, 5642.34)	41.19 (25.83, 61.47)	12010.17 (6351.15, 18993.37)	41.27 (21.74, 64.99)	-0.43 (-0.74, -0.13)
Bosnia and Herzegovina	1348.10 (600.24, 2195.76)	36.17 (16.61, 58.57)	2146.68 (1025.39, 3528.72)	33.94 (16.19, 55.69)	-0.54 (-0.73, -0.35)
Brunei Darussalam	15.35 (8.53, 23.01)	14.21 (8.22, 21.06)	51.71 (24.74, 77.89)	14.49 (7.74, 21.72)	0.30 (0.11, 0.48)
Burkina Faso	392.30 (268.22, 555.10)	9.54 (6.43, 13.74)	1268.81 (815.65, 1871.83)	14.44 (9.29, 21.24)	1.58 (1.49, 1.67)
Canada	7354.43 (3009.15, 12550.16)	22.94 (9.38, 39.20)	8709.01 (4047.82, 14159.08)	11.26 (5.28, 18.11)	-2.57 (-2.75, -2.39)
Central African Republic	243.23 (122.18, 365.49)	24.16 (12.25, 36.72)	730.29 (408.09, 1136.97)	37.40 (21.63, 57.56)	1.38 (1.32, 1.43)
Commonwealth of Dominica	33.19 (21.51, 47.57)	57.78 (37.69, 82.61)	44.82 (28.25, 63.42)	56.65 (35.46, 80.16)	-0.05 (-0.23, 0.13)
Commonwealth of the Bahamas	73.39 (52.62, 100.93)	48.45 (34.21, 66.82)	212.87 (148.57, 290.19)	55.22 (37.31, 76.19)	0.55 (0.38, 0.72)
Cook Islands	12.12 (8.62, 16.18)	100.70 (69.39, 137.32)	16.57 (11.23, 22.80)	66.23 (44.67, 91.69)	-1.32 (-1.45, -1.20)
Czech Republic	8246.06 (2939.10, 14213.97)	60.71 (21.69, 105.36)	6702.76 (3445.05, 10763.10)	29.29 (15.01, 46.93)	-2.34 (-2.43, -2.24)
Democratic People's Republic of Korea	1197.14 (717.52, 1869.80)	10.21 (5.72, 15.89)	6060.01 (3456.26, 10300.55)	21.43 (11.58, 36.27)	2.55 (2.48, 2.62)
Democratic Republic of Sao Tome and Principe	10.61 (6.33, 16.17)	17.25 (10.41, 26.18)	28.57 (14.14, 44.86)	27.97 (14.41, 44.55)	1.46 (1.33, 1.58)
Democratic Republic of the Congo	2834.21 (1661.25, 4205.91)	21.25 (12.63, 31.56)	12124.87 (7051.20, 18147.10)	40.86 (25.03, 61.85)	2.11 (2.08, 2.14)
Democratic Republic of Timor-Leste	15.17 (7.79, 23.35)	6.11 (3.13, 9.99)	81.38 (52.11, 120.22)	9.97 (6.38, 14.42)	1.85 (1.51, 2.18)
Democratic Socialist Republic of Sri Lanka	1476.40 (1030.39, 2041.67)	14.82 (9.94, 20.58)	3928.69 (1963.13, 6627.32)	15.35 (7.59, 26.19)	0.18 (0.02, 0.33)
Dominican Republic	707.40 (396.95, 1104.45)	20.01 (11.18, 31.31)	3077.69 (1605.81, 4951.74)	30.75 (16.22, 49.39)	1.93 (1.75, 2.11)
Eastern Republic of Uruguay	1083.95 (505.37, 1779.01)	28.24 (13.10, 46.43)	1219.26 (666.74, 1861.79)	19.89 (10.95, 30.38)	-1.27 (-1.38, -1.15)
Federal Democratic Republic of Ethiopia	2996.84 (1850.31, 4060.10)	16.68 (10.49, 23.38)	4260.71 (2980.25, 5822.41)	10.69 (7.30, 14.88)	-1.99 (-2.20, -1.78)
Federal Democratic Republic of Nepal	614.09 (351.84, 966.04)	6.34 (3.82, 9.74)	2682.76 (1510.33, 4182.91)	11.67 (6.70, 18.21)	2.38 (2.07, 2.68)
Federal Republic of Germany	45727.45 (22690.27, 73251.37)	35.17 (17.38, 56.62)	40351.46 (21616.95, 62483.61)	17.25 (9.39, 27.04)	-2.09 (-2.18, -2.00)
Federal Republic of Nigeria	8007.48 (5305.19, 11469.35)	20.64 (13.17, 29.80)	21323.94 (11781.90, 30951.38)	27.66 (15.37, 40.37)	0.68 (0.50, 0.86)
Federal Republic of Somalia	441.65 (240.73, 664.08)	19.40 (11.25, 28.09)	1181.98 (657.45, 1786.11)	21.28 (11.74, 33.02)	0.30 (0.19, 0.40)
Federated States of Micronesia	40.71 (20.15, 67.30)	81.12 (40.86, 132.88)	72.26 (31.20, 116.84)	93.54 (42.95, 152.66)	0.48 (0.44, 0.51)
Federative Republic of Brazil	25484.56 (14003.70, 39112.19)	30.17 (17.33, 46.18)	53384.28 (30139.73, 82272.21)	21.54 (12.20, 33.06)	-1.05 (-1.11, -0.99)
French Republic	10174.33 (5097.37, 15871.41)	11.85 (6.01, 18.40)	13496.74 (6757.31, 21290.52)	7.24 (3.80, 11.64)	-1.63 (-1.76, -1.51)
Gabonese Republic	248.04 (162.63, 350.37)	47.83 (31.05, 70.19)	523.45 (320.84, 815.33)	59.94 (36.34, 91.96)	0.56 (0.40, 0.73)
Georgia	3385.22 (1411.57, 5529.18)	57.19 (23.92, 94.22)	3143.69 (1897.96, 4603.21)	50.13 (30.52, 73.63)	-0.15 (-0.56, 0.27)
Grand Duchy of Luxembourg	129.11 (52.95, 214.43)	24.50 (10.27, 40.54)	132.06 (67.70, 212.54)	10.95 (5.59, 17.82)	-2.56 (-2.68, -2.44)
Greenland	13.76 (5.72, 22.86)	45.35 (19.24, 76.23)	13.41 (5.75, 22.07)	21.38 (9.27, 35.94)	-2.46 (-2.58, -2.35)
Grenada	21.05 (12.01, 31.18)	29.80 (16.83, 44.40)	36.73 (23.86, 52.40)	34.69 (22.20, 49.81)	0.64 (0.39, 0.90)
Guam	37.47 (22.50, 54.52)	54.87 (34.19, 80.19)	74.57 (37.17, 114.63)	35.82 (17.76, 54.91)	-0.97 (-1.38, -0.57)
Hashemite Kingdom of Jordan	857.72 (502.67, 1689.01)	74.38 (43.55, 110.78)	3166.09 (1917.43, 4753.31)	53.36 (32.60, 80.20)	-1.49 (-1.79, -1.19)
Hellenic Republic	3322.31 (1438.11, 5533.72)	22.93 (9.83, 38.50)	5483.58 (2863.36, 8806.98)	19.26 (10.03, 30.83)	-0.66 (-0.91, -0.40)
Hungary	9567.88 (4808.75, 15031.18)	68.84 (35.43, 108.14)	10073.44 (5953.51, 15083.17)	48.57 (28.75, 72.82)	-1.01 (-1.14, -0.87)
Independent State of Papua New Guinea	385.45 (194.13, 677.19)	19.34 (10.24, 33.10)	1396.83 (664.10, 2526.38)	23.67 (11.51, 41.50)	0.63 (0.54, 0.73)
Independent State of Samoa	55.87 (27.60, 86.15)	65.35 (33.73, 101.09)	113.20 (52.40, 177.67)	78.62 (36.96, 123.33)	0.63 (0.55, 0.70)
Ireland	1145.82 (463.72, 1957.23)	28.94 (11.84, 49.38)	854.05 (376.61, 1413.48)	10.29 (4.53, 17.01)	-3.36 (-3.53, -3.18)
Islamic Republic of Afghanistan	4921.83 (2610.63, 7585.75)	73.16 (40.85, 110.40)	7287.01 (4030.40, 11249.33)	77.40 (43.01, 117.53)	0.01 (-0.10, 0.12)
Islamic Republic of Iran	9100.45 (5517.90, 13043.10)	40.83 (24.73, 59.30)	30813.60 (18213.82, 44975.67)	44.10 (26.17, 64.64)	0.22 (0.13, 0.32)
Islamic Republic of Mauritania	403.34 (231.73, 616.58)	43.34 (25.44, 65.39)	893.79 (495.87, 1409.02)	46.37 (25.48, 72.47)	-0.02 (-0.13, 0.09)
Islamic Republic of Pakistan	6507.23 (3643.21, 9958.61)	12.17 (6.79, 18.49)	32442.25 (17622.02, 50731.25)	27.56 (15.71, 42.27)	2.77 (2.55, 2.99)
Jamaica	519.20 (356.63, 724.09)	28.63 (19.74, 39.80)	1023.20 (620.25, 1544.36)	31.22 (19.25, 47.21)	0.95 (0.38, 1.53)
Japan	9721.01 (5582.01, 14691.73)	6.33 (3.62, 9.66)	14790.06 (7761.73, 23482.27)	3.28 (1.70, 5.11)	-1.95 (-2.36, -1.55)
Kingdom of Bahrain	100.60 (49.42, 159.41)	70.84 (38.06, 113.08)	312.83 (160.33, 476.99)	51.28 (28.00, 78.10)	-1.62 (-1.93, -1.31)
Kingdom of Belgium	2463.61 (980.63, 4136.65)	16.06 (6.36, 26.89)	2080.10 (986.72, 3486.12)	7.54 (3.41, 12.72)	-2.47 (-2.66, -2.29)
Kingdom of Bhutan	38.74 (19.99, 64.45)	16.17 (8.47, 25.95)	111.92 (60.41, 183.85)	18.85 (10.45, 30.81)	0.51 (0.46, 0.55)
Kingdom of Cambodia	460.24 (270.26, 669.83)	10.50 (6.18, 15.25)	1491.31 (941.96, 2163.09)	12.66 (8.01, 18.76)	0.56 (0.41, 0.71)
Kingdom of Denmark	1951.78 (775.63, 3214.03)	23.48 (9.24, 38.77)	1011.00 (451.51, 1731.13)	7.78 (3.40, 13.34)	-3.89 (-4.02, -3.77)
Kingdom of Eswatini	127.58 (77.91, 184.38)	55.76 (33.09, 80.92)	368.08 (210.63, 572.98)	79.55 (46.79, 121.87)	1.64 (1.11, 2.17)
Kingdom of Lesotho	260.35 (166.16, 377.99)	34.87 (22.15, 51.48)	644.06 (387.16, 947.04)	68.95 (42.24, 101.91)	3.19 (2.62, 3.76)
Kingdom of Morocco	7085.56 (4032.35, 10838.97)	52.93 (30.49, 80.07)	21503.97 (12262.55, 32579.00)	68.70 (39.06, 103.35)	0.95 (0.88, 1.02)
Kingdom of Norway	1546.78 (619.58, 2590.96)	21.81 (8.64, 36.35)	797.58 (378.32, 1330.60)	6.88 (3.16, 11.44)	-4.03 (-4.15, -3.90)
Kingdom of Saudi Arabia	3808.69 (2061.49, 6036.70)	71.22 (38.80, 110.10)	16063.67 (8852.29, 26244.75)	88.75 (50.72, 132.81)	0.59 (0.40, 0.77)
Kingdom of Spain	9782.76 (4141.07, 16853.16)	18.53 (7.89, 32.02)	14098.47 (7283.48, 22661.80)	11.33 (5.98, 18.00)	-1.74 (-1.86, -1.61)
Kingdom of Sweden	3418.52 (1328.78, 5815.73)	21.39 (8.24, 36.16)	2892.94 (1488.14, 4638.70)	10.80 (5.53, 17.26)	-2.01 (-2.11, -1.92)
Kingdom of Thailand	1706.04 (800.10, 2777.68)	4.90 (2.37, 7.98)	7914.42 (3249.91, 13818.03)	7.44 (3.04, 12.91)	0.79 (0.49, 1.08)
Kingdom of the Netherlands	3589.04 (1430.69, 6133.65)	17.89 (7.12, 30.70)	3109.98 (1479.72, 5244.12)	7.99 (3.75, 13.45)	-3.01 (-3.19, -2.83)
Kingdom of Tonga	19.76 (8.25, 31.48)	34.98 (15.22, 56.01)	35.78 (16.39, 57.82)	44.68 (20.50, 72.52)	0.91 (0.79, 1.02)
Kyrgyz Republic	1300.08 (505.23, 2171.86)	46.55 (18.11, 77.95)	2341.10 (1064.33, 3730.39)	55.90 (26.30, 89.69)	0.40 (0.02, 0.78)
Lao People's Democratic Republic	366.01 (187.96, 560.76)	18.51 (9.56, 28.50)	974.29 (551.32, 1541.50)	21.69 (12.73, 34.04)	0.53 (0.50, 0.56)
Lebanese Republic	1056.46 (517.65, 1689.01)	53.40 (26.35, 85.53)	1814.39 (937.89, 2854.90)	28.16 (14.57, 44.14)	-2.26 (-2.57, -1.95)
Malaysia	1536.00 (692.69, 2426.97)	16.41 (7.60, 25.66)	5714.47 (2359.09, 9116.52)	20.79 (8.64, 33.46)	0.62 (0.48, 0.76)
Mongolia	416.96 (167.30, 708.65)	42.98 (17.86, 72.83)	665.13 (244.16, 1140.91)	33.45 (12.85, 56.55)	-1.27 (-1.60, -0.94)
Montenegro	239.39 (97.44, 405.33)	39.92 (16.33, 67.31)	527.48 (215.26, 894.66)	59.90 (25.05, 101.05)	1.37 (1.20, 1.54)
New Zealand	1138.78 (479.39, 1890.23)	29.52 (12.44, 48.95)	1197.93 (519.91, 2006.95)	13.43 (5.84, 22.27)	-2.74 (-2.87, -2.61)
North Macedonia	1059.97 (534.27, 1659.47)	62.15 (33.08, 96.71)	1792.30 (932.05, 2893.81)	71.28 (36.34, 114.37)	0.30 (-0.12, 0.71)
Northern Mariana Islands	8.06 (2.82, 14.03)	37.23 (13.81, 63.83)	23.76 (9.85, 37.97)	46.55 (19.36, 75.04)	0.89 (0.74, 1.05)
Palestine	609.87 (350.31, 987.32)	80.62 (45.54, 128.29)	1394.86 (777.20, 2062.61)	70.67 (38.68, 104.40)	-0.49 (-0.72, -0.25)
People's Democratic Republic of Algeria	5034.71 (3193.81, 7591.92)	54.06 (32.76, 81.27)	17417.10 (9851.02, 25853.33)	63.56 (35.45, 96.75)	0.66 (0.59, 0.73)
People's Republic of Bangladesh	2481.06 (1633.34, 3544.05)	5.57 (3.55, 8.16)	13717.95 (7248.92, 21908.65)	10.49 (5.69, 17.11)	2.43 (2.27, 2.59)
People's Republic of China	88033.66 (61877.55, 122803.50)	13.73 (8.44, 19.94)	354345.48 (188060.31, 564964.38)	18.80 (10.07, 29.43)	1.20 (1.01, 1.39)
Plurinational State of Bolivia	659.49 (345.09, 1035.40)	21.85 (11.50, 33.89)	1756.14 (896.99, 2878.75)	21.11 (11.02, 34.13)	-0.11 (-0.24, 0.02)
Portuguese Republic	2745.78 (1120.43, 4848.08)	21.56 (8.80, 38.20)	3269.24 (1628.90, 5321.52)	11.12 (5.54, 18.37)	-2.56 (-2.76, -2.36)
Principality of Andorra	7.72 (3.78, 13.04)	15.85 (8.05, 26.46)	17.77 (9.18, 30.74)	10.06 (5.32, 17.46)	-1.17 (-1.39, -0.94)
Principality of Monaco	16.35 (6.56, 28.63)	21.70 (8.47, 37.35)	16.80 (8.17, 28.52)	14.50 (7.23, 24.55)	-1.32 (-1.37, -1.26)
Puerto Rico	1079.57 (579.28, 1697.43)	31.31 (16.67, 49.42)	1474.84 (862.88, 2188.39)	18.86 (11.06, 28.03)	-1.83 (-2.01, -1.65)
Republic of Albania	626.19 (285.33, 1051.70)	35.28 (16.80, 60.13)	1433.36 (613.82, 2514.30)	34.67 (14.73, 60.86)	0.27 (0.06, 0.48)
Republic of Angola	843.49 (529.78, 1224.66)	24.48 (15.52, 34.89)	3370.41 (2089.52, 4921.13)	33.68 (21.70, 49.60)	0.75 (0.62, 0.88)
Republic of Armenia	1285.04 (606.57, 2051.86)	53.16 (25.61, 85.54)	1840.39 (915.62, 2917.76)	42.83 (21.23, 67.74)	-1.22 (-1.46, -0.99)
Republic of Austria	3133.02 (1491.60, 5201.15)	26.06 (12.29, 42.94)	3506.03 (1952.68, 5551.36)	15.66 (8.84, 24.96)	-1.63 (-1.77, -1.48)
Republic of Azerbaijan	2804.18 (1355.76, 4489.40)	61.52 (30.70, 98.77)	5267.96 (2453.61, 8486.67)	60.05 (28.53, 95.94)	-0.05 (-0.29, 0.19)
Republic of Belarus	5935.49 (2189.06, 10245.38)	47.59 (17.47, 82.12)	10283.41 (3685.32, 17907.74)	63.39 (22.72, 110.94)	0.38 (-0.07, 0.83)
Republic of Benin	330.82 (194.19, 490.98)	17.11 (9.86, 25.92)	1104.51 (631.93, 1685.00)	22.55 (12.86, 34.76)	0.89 (0.80, 0.99)
Republic of Botswana	157.42 (99.58, 239.67)	33.95 (21.03, 52.50)	495.19 (314.42, 704.52)	41.74 (25.88, 60.31)	1.03 (0.69, 1.37)
Republic of Bulgaria	8551.11 (4337.09, 13568.62)	86.79 (43.51, 137.45)	14847.47 (9561.06, 21083.60)	105.44 (67.21, 150.34)	0.70 (0.41, 1.00)
Republic of Burundi	283.65 (100.13, 452.12)	13.69 (4.61, 22.00)	566.53 (370.38, 817.12)	13.54 (8.31, 20.32)	-0.60 (-0.83, -0.36)
Republic of Cabo Verde	34.38 (21.73, 49.41)	15.17 (9.60, 21.47)	115.36 (67.45, 181.35)	26.70 (15.64, 41.79)	1.51 (1.21, 1.81)
Republic of Cameroon	1197.24 (712.81, 1770.03)	29.33 (17.82, 42.71)	4906.53 (2558.26, 8105.31)	43.44 (22.88, 69.99)	1.32 (0.98, 1.66)
Republic of Chad	424.68 (253.98, 624.36)	15.97 (9.38, 23.54)	1206.35 (690.95, 1811.40)	22.43 (12.96, 34.38)	1.00 (0.79, 1.22)
Republic of Chile	2476.01 (1274.74, 4024.43)	26.97 (13.85, 43.64)	4554.06 (2567.59, 6903.52)	17.47 (9.88, 26.51)	-1.09 (-1.20, -0.97)
Republic of Colombia	4548.29 (2852.59, 6524.31)	28.32 (17.77, 40.26)	9800.94 (5126.68, 15981.11)	17.33 (9.09, 28.24)	-1.94 (-2.15, -1.73)
Republic of Costa Rica	341.57 (181.87, 535.69)	20.33 (10.88, 31.84)	894.20 (508.68, 1372.51)	15.83 (9.02, 24.28)	-1.27 (-1.44, -1.09)
Republic of Côte d'Ivoire	767.32 (471.21, 1143.17)	21.20 (13.30, 31.20)	3352.71 (1896.21, 5183.47)	32.43 (19.26, 48.88)	1.37 (1.14, 1.61)
Republic of Croatia	3103.29 (1579.16, 5024.85)	57.92 (29.84, 93.58)	3174.74 (1616.14, 5061.05)	33.21 (16.90, 52.41)	-1.62 (-1.75, -1.49)
Republic of Cuba	2023.18 (879.67, 3166.83)	20.44 (8.84, 32.21)	5037.56 (2843.54, 7747.74)	24.85 (14.06, 38.27)	0.63 (0.42, 0.84)
Republic of Cyprus	185.95 (97.92, 281.44)	33.35 (16.91, 52.26)	329.98 (182.08, 530.35)	20.38 (11.48, 32.26)	-1.87 (-2.07, -1.66)
Republic of Djibouti	15.16 (10.24, 22.73)	13.81 (8.72, 20.70)	83.07 (52.51, 123.63)	15.75 (9.44, 23.82)	0.23 (0.15, 0.31)
Republic of Ecuador	1101.28 (671.31, 1647.46)	22.13 (13.57, 32.59)	3387.54 (1723.44, 5414.13)	22.33 (11.78, 35.43)	0.65 (0.26, 1.03)
Republic of El Salvador	621.59 (280.43, 1022.24)	20.97 (9.64, 34.18)	1437.70 (664.12, 2383.52)	21.99 (10.06, 36.35)	0.04 (-0.21, 0.29)
Republic of Equatorial Guinea	73.20 (45.42, 107.84)	41.01 (25.42, 60.37)	207.29 (113.73, 336.49)	48.71 (27.83, 77.51)	0.27 (-0.06, 0.60)
Republic of Estonia	1264.53 (519.98, 2063.10)	64.27 (26.49, 104.83)	1799.42 (974.92, 2498.04)	56.17 (33.30, 76.69)	-0.12 (-0.41, 0.17)
Republic of Fiji	250.55 (120.57, 401.30)	68.08 (33.97, 109.58)	582.01 (278.38, 934.92)	81.65 (40.55, 131.65)	0.38 (0.24, 0.53)
Republic of Finland	2244.06 (979.83, 3718.22)	31.51 (13.70, 51.93)	2899.43 (1583.65, 4496.70)	18.98 (10.51, 29.11)	-1.52 (-1.65, -1.39)
Republic of Ghana	1314.39 (839.62, 1928.19)	21.50 (13.99, 31.16)	5042.42 (2823.04, 7997.45)	33.09 (18.23, 51.41)	1.09 (0.88, 1.31)
Republic of Guatemala	657.81 (306.88, 1073.01)	21.96 (10.87, 35.31)	1857.07 (835.55, 3134.63)	18.87 (8.73, 31.27)	-0.46 (-0.90, -0.02)
Republic of Guinea	569.75 (351.43, 841.63)	17.78 (10.84, 26.14)	1371.20 (836.31, 2008.65)	25.48 (15.42, 37.28)	1.28 (1.15, 1.40)
Republic of Guinea-Bissau	104.63 (57.02, 155.26)	27.11 (15.88, 40.92)	278.00 (159.47, 416.34)	39.82 (23.71, 59.02)	1.26 (1.13, 1.39)
Republic of Guyana	240.53 (158.99, 339.62)	65.87 (43.37, 92.64)	367.21 (229.31, 539.85)	60.35 (38.26, 88.11)	0.20 (-0.01, 0.42)
Republic of Haiti	625.72 (341.54, 967.02)	20.12 (11.26, 30.57)	1968.13 (1057.96, 3099.73)	27.78 (15.11, 43.82)	1.27 (1.18, 1.36)
Republic of Honduras	471.83 (282.26, 719.81)	25.34 (15.46, 38.55)	2512.28 (1388.46, 3788.17)	44.96 (25.80, 68.27)	2.02 (1.81, 2.23)
Republic of Iceland	72.09 (29.50, 123.42)	24.41 (9.95, 41.79)	76.63 (35.09, 131.05)	11.53 (5.33, 19.59)	-2.39 (-2.48, -2.30)
Republic of India	29063.04 (17212.21, 42605.28)	6.47 (3.82, 9.38)	161910.58 (87259.37, 241010.54)	14.10 (7.78, 21.10)	2.80 (2.67, 2.93)
Republic of Indonesia	8774.44 (5723.35, 12099.53)	8.99 (5.56, 12.56)	45829.84 (27573.30, 67711.64)	19.63 (12.14, 28.61)	2.76 (2.58, 2.94)
Republic of Iraq	5724.38 (2769.72, 9423.18)	74.18 (36.23, 121.95)	16063.67 (7377.29, 26244.76)	79.95 (39.22, 128.73)	-0.29 (-0.47, -0.12)
Republic of Italy	16725.88 (8879.62, 25684.55)	19.16 (10.09, 29.60)	28884.02 (14703.40, 44347.63)	14.63 (7.90, 22.04)	-0.93 (-0.99, -0.86)
Republic of Kazakhstan	5824.39 (2411.34, 9719.07)	50.43 (20.74, 83.74)	7300.75 (2990.49, 12496.27)	49.66 (20.37, 85.63)	-1.16 (-1.93, -0.39)
Republic of Kenya	822.33 (574.56, 1109.63)	11.29 (7.42, 15.99)	4092.01 (2652.71, 5867.75)	21.22 (13.56, 31.18)	2.49 (2.32, 2.67)
Republic of Kiribati	18.75 (7.35, 31.30)	45.28 (18.72, 76.27)	49.84 (19.02, 83.65)	62.43 (24.31, 103.85)	1.04 (0.80, 1.09)
Republic of Korea	1737.09 (1067.88, 2799.57)	8.01 (4.40, 12.57)	4069.24 (2256.74, 6551.62)	4.58 (2.51, 7.39)	-2.11 (-2.31, -1.91)
Republic of Latvia	2111.86 (726.47, 3690.71)	60.64 (20.96, 106.27)	2053.19 (1073.69, 3370.05)	46.62 (23.99, 76.77)	-1.09 (-1.40, -0.77)
Republic of Liberia	317.71 (204.06, 476.77)	28.46 (18.23, 42.17)	883.56 (497.68, 1373.50)	43.08 (24.83, 67.85)	1.26 (1.13, 1.38)
Republic of Lithuania	2264.17 (863.03, 3891.51)	51.49 (19.64, 88.24)	2785.18 (1325.08, 4598.95)	43.41 (20.78, 71.64)	-0.55 (-0.83, -0.28)
Republic of Madagascar	1019.47 (718.84, 1457.09)	22.53 (15.16, 32.96)	3418.69 (2114.79, 4905.80)	36.15 (22.41, 52.71)	1.40 (1.32, 1.48)
Republic of Malawi	402.28 (241.99, 591.65)	12.35 (7.15, 18.29)	1419.04 (890.96, 2142.71)	21.40 (13.45, 31.33)	1.54 (1.36, 1.71)
Republic of Maldives	14.24 (7.09, 22.23)	14.07 (7.14, 21.59)	34.78 (17.69, 56.22)	9.58 (5.22, 15.12)	-1.67 (-1.86, -1.47)
Republic of Mali	598.09 (339.32, 877.14)	15.97 (9.08, 23.54)	1411.78 (831.55, 2111.32)	16.68 (9.90, 24.95)	0.12 (0.03, 0.21)
Republic of Malta	92.95 (40.38, 148.42)	22.81 (9.89, 36.22)	141.41 (72.08, 230.83)	13.25 (6.78, 21.56)	-1.69 (-1.91, -1.47)
Republic of Mauritius	253.40 (164.99, 359.41)	35.85 (22.99, 50.31)	466.71 (293.48, 660.99)	26.81 (16.78, 37.63)	-1.24 (-1.66, -0.82)
Republic of Moldova	2293.64 (839.14, 3835.69)	61.33 (22.73, 102.94)	4094.39 (2248.65, 6181.97)	67.87 (37.34, 102.34)	-0.18 (-0.47, 0.10)
Republic of Mozambique	853.18 (550.17, 1204.97)	16.80 (10.60, 23.88)	2923.45 (1786.89, 4335.76)	29.81 (18.16, 45.40)	2.33 (2.13, 2.54)
Republic of Namibia	189.33 (127.74, 273.17)	35.48 (23.50, 54.21)	623.03 (377.19, 933.34)	55.39 (32.51, 83.64)	1.25 (0.89, 1.61)
Republic of Nauru	6.555 (2.874, 10.075)	121.295 (55.564, 189.625)	9.801 (4.198, 15.519)	151.945 (67.117, 239.358)	0.643 (0.292, 0.994)
Republic of Nicaragua	282.54 (152.66, 435.63)	19.84 (11.11, 30.62)	950.54 (479.18, 1535.33)	21.46 (11.31, 34.85)	0.381 (0.192, 0.57)
Republic of Niue	1.315 (0.660, 2.056)	60.23 (30.005, 94.909)	1.540 (0.741, 2.463)	73.039 (35.419, 117.477)	0.434 (0.359, 0.509)
Republic of Palau	5.970 (2.166, 10.292)	60.086 (22.422, 101.935)	14.387 (5.769, 24.362)	66.558 (26.833, 112.213)	0.451 (0.371, 0.53)
Republic of Panama	286.81 (130.02, 489.54)	20.71 (9.36, 35.31)	878.01 (439.27, 1398.75)	19.27 (9.65, 30.67)	-0.26 (-0.48, -0.04)
Republic of Paraguay	509.48 (271.43, 820.35)	23.87 (12.69, 38.26)	1579.53 (885.46, 2578.22)	28.18 (16.08, 45.65)	0.78 (0.66, 0.91)
Republic of Peru	1496.09 (749.33, 2473.09)	12.70 (6.64, 20.80)	3506.94 (1688.07, 5759.76)	10.30 (5.01, 16.88)	-1.09 (-1.52, -0.66)
Republic of Poland	21389.35 (9665.43, 35283.53)	51.45 (23.41, 84.81)	22867.35 (12359.79, 35756.10)	29.87 (16.33, 46.60)	-2.03 (-2.18, -1.89)
Republic of Rwanda	551.41 (211.95, 801.13)	22.25 (8.90, 32.96)	881.08 (498.85, 1328.54)	17.04 (8.72, 26.24)	-1.84 (-2.25, -1.43)
Republic of San Marino	5.801 (2.940, 9.333)	15.73 (7.973, 25.401)	7.608 (3.650, 13.190)	7.468 (3.629, 12.991)	-1.67 (-2.04, -1.30)
Republic of Senegal	667.04 (423.66, 974.99)	21.65 (13.69, 31.12)	2101.64 (1274.61, 3170.70)	29.15 (17.76, 42.98)	0.89 (0.82, 0.97)
Republic of Serbia	5628.45 (2754.92, 9061.18)	63.38 (31.95, 102.93)	9172.70 (4762.15, 14404.97)	53.49 (27.65, 83.77)	-1.16 (-1.44, -0.89)
Republic of Seychelles	26.55 (19.67, 34.48)	47.15 (34.91, 61.41)	48.90 (33.75, 65.89)	45.22 (30.23, 61.61)	-0.07 (-0.21, 0.07)
Republic of Sierra Leone	325.27 (199.83, 479.16)	16.93 (10.13, 24.99)	931.02 (515.75, 1438.94)	26.01 (15.02, 40.43)	1.54 (1.33, 1.74)
Republic of Singapore	253.96 (150.16, 372.96)	11.82 (7.11, 17.55)	649.32 (391.28, 945.82)	7.61 (4.55, 11.14)	-1.49 (-1.64, -1.34)
Republic of Slovenia	845.08 (444.73, 1330.06)	34.66 (18.13, 54.68)	1125.01 (574.51, 1733.91)	20.60 (10.74, 31.47)	-1.72 (-1.82, -1.62)
Republic of South Africa	6452.43 (4348.90, 8997.76)	32.94 (21.49, 46.09)	20381.56 (13388.36, 28358.41)	50.22 (32.69, 71.03)	1.38 (0.91, 1.85)
Republic of South Sudan	249.78 (135.10, 392.16)	11.08 (6.08, 17.65)	411.68 (242.93, 621.82)	11.90 (6.82, 17.72)	0.04 (-0.32, 0.39)
Republic of Sudan	5955.90 (3495.12, 9133.17)	68.24 (39.90, 102.05)	14043.73 (7265.45, 22196.52)	77.61 (41.81, 123.47)	0.31 (0.22, 0.39)
Republic of Suriname	63.36 (37.91, 94.83)	25.16 (15.24, 37.65)	155.86 (84.36, 243.73)	24.79 (13.39, 38.41)	0.09 (-0.14, 0.32)
Republic of Tajikistan	1582.69 (848.75, 2411.92)	62.55 (33.82, 94.78)	2642.89 (1330.37, 4234.18)	56.35 (28.76, 89.25)	-0.66 (-1.05, -0.26)
Republic of the Congo	377.33 (233.54, 554.34)	38.25 (24.17, 55.67)	1229.64 (773.67, 1844.91)	51.93 (33.14, 76.20)	0.69 (0.54, 0.84)
Republic of the Gambia	73.52 (45.13, 107.82)	22.18 (13.78, 32.90)	346.19 (197.93, 541.38)	37.32 (21.48, 58.15)	1.54 (1.35, 1.73)
Republic of the Marshall Islands	12.78 (6.28, 20.28)	76.78 (39.32, 121.63)	34.32 (14.98, 56.44)	93.44 (43.39, 152.66)	0.62 (0.51, 0.73)
Republic of the Niger	347.69 (195.97, 513.58)	13.82 (7.58, 21.56)	1201.22 (653.63, 1823.14)	15.70 (8.75, 24.00)	0.33 (0.18, 0.48)
Republic of the Philippines	4845.96 (3437.12, 6607.48)	17.08 (11.89, 23.31)	22022.42 (13830.92, 32092.00)	27.32 (17.66, 39.36)	1.66 (1.53, 1.78)
Republic of the Union of Myanmar	3914.94 (2222.04, 6079.09)	16.80 (9.72, 25.42)	7592.74 (4492.76, 11832.84)	15.81 (9.53, 24.52)	-0.50 (-0.62, -0.38)
Republic of Trinidad and Tobago	381.39 (233.23, 545.93)	49.88 (30.31, 71.55)	619.30 (336.45, 961.04)	32.69 (17.88, 50.86)	-1.85 (-2.13, -1.58)
Republic of Tunisia	1653.13 (1032.78, 2444.72)	38.09 (23.22, 57.20)	6138.00 (3334.37, 9622.45)	50.66 (28.02, 79.79)	0.81 (0.74, 0.88)
Republic of Turkey	15845.77 (8984.29, 24064.76)	52.13 (29.51, 78.69)	38205.95 (21113.32, 58421.62)	44.72 (24.91, 68.28)	-0.46 (-0.83, -0.09)
Republic of Uganda	630.30 (334.57, 964.56)	10.92 (5.48, 16.60)	1986.37 (1209.31, 3051.64)	15.02 (8.77, 23.72)	0.47 (0.24, 0.71)
Republic of Uzbekistan	5478.09 (2345.24, 8932.20)	50.55 (21.69, 82.53)	14770.17 (6907.26, 23809.64)	65.65 (31.00, 107.66)	0.80 (0.43, 1.17)
Republic of Vanuatu	28.27 (13.59, 50.29)	42.98 (21.37, 74.24)	108.48 (47.55, 179.85)	58.45 (26.88, 97.05)	0.90 (0.84, 0.97)
Republic of Yemen	2085.78 (1248.43, 3086.30)	47.22 (29.16, 69.36)	8610.35 (4739.51, 13218.37)	68.95 (39.37, 107.54)	1.04 (0.84, 1.24)
Republic of Zambia	549.55 (380.94, 746.59)	21.79 (14.58, 30.76)	2236.89 (1303.55, 3367.06)	37.11 (21.87, 55.10)	1.50 (1.36, 1.64)
Republic of Zimbabwe	615.49 (417.64, 834.11)	17.70 (11.76, 25.91)	2728.71 (1614.07, 4153.28)	44.40 (27.27, 66.29)	3.83 (3.19, 4.48)
Romania	15985.74 (8967.27, 24435.21)	65.04 (36.12, 101.10)	21225.41 (12098.86, 32265.96)	53.41 (30.45, 81.59)	-0.90 (-1.10, -0.70)
Russian Federation	84806.40 (28547.63, 145459.70)	51.62 (17.20, 88.71)	119568.61 (47148.43, 200548.71)	50.03 (19.69, 84.12)	-0.61 (-1.24, 0.01)
Saint Kitts and Nevis	15.65 (8.17, 24.65)	43.50 (22.72, 69.04)	23.38 (13.56, 34.81)	38.85 (22.85, 58.18)	-0.06 (-0.35, 0.24)
Saint Lucia	26.56 (17.25, 38.73)	34.27 (21.60, 50.23)	61.99 (37.96, 91.77)	26.65 (16.22, 39.59)	-1.00 (-1.44, -0.55)
Saint Vincent and the Grenadines	20.42 (14.08, 29.03)	30.43 (20.37, 43.88)	52.85 (36.33, 72.92)	40.31 (26.70, 56.52)	0.86 (0.45, 1.27)
Slovak Republic	3825.34 (1618.90, 6270.67)	65.84 (27.96, 107.90)	4047.71 (1967.74, 6618.12)	42.45 (20.75, 69.34)	-1.36 (-1.44, -1.27)
Socialist Republic of Viet Nam	1704.93 (1071.40, 2690.06)	4.65 (2.86, 7.52)	7319.69 (4424.23, 10881.77)	8.02 (4.71, 11.99)	2.29 (2.01, 2.58)
Solomon Islands	58.08 (25.96, 102.66)	39.97 (19.03, 70.29)	200.03 (82.25, 346.95)	52.99 (23.12, 91.39)	0.93 (0.80, 1.06)
State of Eritrea	149.74 (81.30, 219.64)	15.85 (8.99, 24.15)	436.65 (271.79, 641.13)	19.01 (11.63, 28.96)	0.58 (0.47, 0.70)
State of Israel	1158.80 (509.53, 1904.43)	25.15 (11.06, 41.33)	998.86 (462.92, 1683.22)	7.27 (3.36, 12.23)	-4.38 (-4.63, -4.14)
State of Kuwait	319.42 (195.02, 458.91)	55.91 (34.61, 80.98)	1155.48 (616.98, 1778.58)	41.30 (22.79, 63.61)	-0.95 (-1.35, -0.54)
State of Libya	679.24 (355.55, 1041.54)	37.70 (19.70, 57.59)	3377.86 (1845.88, 5279.45)	69.82 (37.75, 108.86)	2.44 (2.25, 2.62)
State of Qatar	65.78 (30.86, 105.63)	77.61 (39.38, 125.78)	266.35 (124.76, 422.94)	40.28 (20.11, 63.35)	-2.82 (-3.51, -2.12)
Sultanate of Oman	345.75 (191.07, 549.47)	54.25 (30.08, 83.08)	1080.41 (609.83, 1578.02)	66.23 (39.65, 96.63)	1.20 (0.99, 1.42)
Swiss Confederation	2143.35 (1091.73, 3427.27)	19.57 (9.87, 31.26)	2240.83 (1189.25, 3452.31)	9.27 (5.14, 14.25)	-2.30 (-2.36, -2.24)
Syrian Arab Republic	3777.21 (1947.48, 5774.53)	77.70 (42.03, 120.05)	11961.56 (5701.28, 19497.75)	108.59 (52.88, 174.49)	0.69 (0.50, 0.89)
Taiwan (Province of China)	1668.18 (1124.73, 2363.74)	12.67 (8.62, 18.32)	4253.73 (2587.11, 6109.85)	9.76 (5.99, 13.93)	-0.25 (-0.72, 0.21)
Togolese Republic	234.27 (149.02, 345.54)	20.39 (13.16, 29.86)	1128.70 (652.38, 1698.37)	33.24 (19.05, 50.19)	1.53 (1.38, 1.69)
Tokelau	0.78 (0.41, 1.31)	60.11 (31.41, 100.81)	0.94 (0.44, 1.53)	64.08 (30.21, 104.57)	0.14 (0.08, 0.21)
Turkmenistan	1075.35 (457.95, 1753.37)	61.09 (26.61, 99.28)	2428.87 (1027.38, 4153.31)	65.82 (28.35, 110.93)	-0.55 (-0.93, -0.17)
Tuvalu	5.17 (2.51, 8.27)	74.44 (38.48, 118.79)	8.81 (4.15, 13.93)	85.21 (40.58, 135.30)	0.54 (0.49, 0.59)
Ukraine	36489.04 (13782.07, 62000.12)	54.53 (20.69, 93.72)	55754.73 (21966.21, 94472.95)	71.00 (27.97, 120.53)	0.27 (-0.24, 0.77)
Union of the Comoros	36.80 (21.16, 54.34)	21.93 (12.77, 32.41)	119.93 (73.34, 178.82)	27.56 (16.95, 41.97)	0.50 (0.30, 0.70)
United Arab Emirates	228.50 (109.95, 373.97)	55.78 (29.07, 87.22)	1419.48 (731.83, 2210.86)	63.75 (35.49, 94.89)	2.01 (1.44, 2.59)
United Kingdom of Great Britain and Northern Ireland	28906.89 (11797.11, 49193.26)	31.68 (12.93, 53.61)	17668.13 (8378.59, 29442.07)	12.59 (6.03, 20.81)	-3.27 (-3.45, -3.10)
United Mexican States	7956.88 (4263.39, 12486.25)	21.28 (11.94, 33.46)	30430.91 (15246.28, 48705.01)	25.52 (12.93, 40.91)	0.49 (0.24, 0.75)
United Republic of Tanzania	1894.27 (1136.70, 2674.85)	20.61 (11.64, 31.19)	6645.55 (4005.09, 10075.73)	30.28 (18.43, 46.13)	1.24 (1.18, 1.29)
United States of America	99181.77 (47397.00, 162300.23)	31.01 (14.90, 50.33)	152511.93 (87452.64, 228828.33)	25.66 (14.80, 38.02)	-0.86 (-1.01, -0.71)
United States Virgin Islands	38.57 (21.23, 59.39)	53.11 (29.53, 82.84)	51.47 (28.18, 78.98)	30.75 (16.77, 47.32)	-1.57 (-1.73, -1.42)
